# Supplementary material
Source: MDPI journal article supplement (https://www.mdpi.com/2571-631X/6/1/16)
Supplement: s1 [file s1]

Archive with 1 entries (1 files):
- vibration-2225530-supplementary.pdf
