# Supplementary material
Source: MDPI journal article supplement (https://www.mdpi.com/2571-631X/6/1/16)
Supplement: s1 [file s1 › vibration-2225530-supplementary.pdf]

**Table S1: Wheelchair Driving Experience Questionnaire**

Please rank the following questions on a scale of 0-10 (0-Bad experience, 10-Good experience) by filling in the circle that is most representative of your experience.

| 1. How was your experience when ascending/descending the curb cut? |                       |                       |                       |                       |                        |                       |                       |                       |                       |                       |
|--------------------------------------------------------------------|-----------------------|-----------------------|-----------------------|-----------------------|------------------------|-----------------------|-----------------------|-----------------------|-----------------------|-----------------------|
| Bad experience (0)                                                 | 1                     | 2                     | 3                     | 4                     | Neutral experience (5) | 6                     | 7                     | 8                     | 9                     | Good experience (10)  |
| <input type="radio"/>                                              | <input type="radio"/> | <input type="radio"/> | <input type="radio"/> | <input type="radio"/> | <input type="radio"/>  | <input type="radio"/> | <input type="radio"/> | <input type="radio"/> | <input type="radio"/> | <input type="radio"/> |
|                                                                    |                       |                       |                       |                       |                        |                       |                       |                       |                       |                       |
| 2. How was your experience when driving through grass?             |                       |                       |                       |                       |                        |                       |                       |                       |                       |                       |
| Bad experience (0)                                                 | 1                     | 2                     | 3                     | 4                     | Neutral experience (5) | 6                     | 7                     | 8                     | 9                     | Good experience (10)  |
| <input type="radio"/>                                              | <input type="radio"/> | <input type="radio"/> | <input type="radio"/> | <input type="radio"/> | <input type="radio"/>  | <input type="radio"/> | <input type="radio"/> | <input type="radio"/> | <input type="radio"/> | <input type="radio"/> |
|                                                                    |                       |                       |                       |                       |                        |                       |                       |                       |                       |                       |
| 3. How was your experience when driving over the uneven sidewalk?  |                       |                       |                       |                       |                        |                       |                       |                       |                       |                       |
| Bad experience (0)                                                 | 1                     | 2                     | 3                     | 4                     | Neutral experience (5) | 6                     | 7                     | 8                     | 9                     | Good experience (10)  |
| <input type="radio"/>                                              | <input type="radio"/> | <input type="radio"/> | <input type="radio"/> | <input type="radio"/> | <input type="radio"/>  | <input type="radio"/> | <input type="radio"/> | <input type="radio"/> | <input type="radio"/> | <input type="radio"/> |
|                                                                    |                       |                       |                       |                       |                        |                       |                       |                       |                       |                       |
| 4. How was your experience when driving over potholes?             |                       |                       |                       |                       |                        |                       |                       |                       |                       |                       |
| Bad experience (0)                                                 | 1                     | 2                     | 3                     | 4                     | Neutral experience (5) | 6                     | 7                     | 8                     | 9                     | Good experience (10)  |
| <input type="radio"/>                                              | <input type="radio"/> | <input type="radio"/> | <input type="radio"/> | <input type="radio"/> | <input type="radio"/>  | <input type="radio"/> | <input type="radio"/> | <input type="radio"/> | <input type="radio"/> | <input type="radio"/> |
|                                                                    |                       |                       |                       |                       |                        |                       |                       |                       |                       |                       |
| 5. How was your experience when entering/exiting the vehicle?      |                       |                       |                       |                       |                        |                       |                       |                       |                       |                       |
| Bad experience (0)                                                 | 1                     | 2                     | 3                     | 4                     | Neutral experience (5) | 6                     | 7                     | 8                     | 9                     | Good experience (10)  |
| <input type="radio"/>                                              | <input type="radio"/> | <input type="radio"/> | <input type="radio"/> | <input type="radio"/> | <input type="radio"/>  | <input type="radio"/> | <input type="radio"/> | <input type="radio"/> | <input type="radio"/> | <input type="radio"/> |
|                                                                    |                       |                       |                       |                       |                        |                       |                       |                       |                       |                       |
| 6. How was your experience when docking in the vehicle?            |                       |                       |                       |                       |                        |                       |                       |                       |                       |                       |
| Bad experience (0)                                                 | 1                     | 2                     | 3                     | 4                     | Neutral experience (5) | 6                     | 7                     | 8                     | 9                     | Good experience (10)  |
| <input type="radio"/>                                              | <input type="radio"/> | <input type="radio"/> | <input type="radio"/> | <input type="radio"/> | <input type="radio"/>  | <input type="radio"/> | <input type="radio"/> | <input type="radio"/> | <input type="radio"/> | <input type="radio"/> |
|                                                                    |                       |                       |                       |                       |                        |                       |                       |                       |                       |                       |
| 7. How was your experience overall?                                |                       |                       |                       |                       |                        |                       |                       |                       |                       |                       |

|                          |   |   |   |   |                              |   |   |   |   |                            |
|--------------------------|---|---|---|---|------------------------------|---|---|---|---|----------------------------|
| Bad<br>experience<br>(0) | 1 | 2 | 3 | 4 | Neutral<br>experience<br>(5) | 6 | 7 | 8 | 9 | Good<br>experience<br>(10) |
| ○                        | ○ | ○ | ○ | ○ | ○                            | ○ | ○ | ○ | ○ | ○                          |

**Table S2: Comfort Questionnaire**

Please rank the following questions on a scale of 0-10 (0-Not at all comfortable, 10-Extremely comfortable) by filling in the circle that is most representative of your experience.

|                                                                           |   |   |   |   |                                  |   |   |   |   |                                  |
|---------------------------------------------------------------------------|---|---|---|---|----------------------------------|---|---|---|---|----------------------------------|
| <b>1. How comfortable did you feel when riding in the vehicle?</b>        |   |   |   |   |                                  |   |   |   |   |                                  |
| Not at all<br>comfortable<br>(0)                                          | 1 | 2 | 3 | 4 | Moderately<br>comfortable<br>(5) | 6 | 7 | 8 | 9 | Extremely<br>comfortable<br>(10) |
| ○                                                                         | ○ | ○ | ○ | ○ | ○                                | ○ | ○ | ○ | ○ | ○                                |
| <b>2. How comfortable did you feel when docking in the vehicle?</b>       |   |   |   |   |                                  |   |   |   |   |                                  |
| Not at all<br>comfortable<br>(0)                                          | 1 | 2 | 3 | 4 | Moderately<br>comfortable<br>(5) | 6 | 7 | 8 | 9 | Extremely<br>comfortable<br>(10) |
| ○                                                                         | ○ | ○ | ○ | ○ | ○                                | ○ | ○ | ○ | ○ | ○                                |
| <b>3. How comfortable did you feel when entering/exiting the vehicle?</b> |   |   |   |   |                                  |   |   |   |   |                                  |
| Not at all<br>comfortable<br>(0)                                          | 1 | 2 | 3 | 4 | Moderately<br>comfortable<br>(5) | 6 | 7 | 8 | 9 | Extremely<br>comfortable<br>(10) |
| ○                                                                         | ○ | ○ | ○ | ○ | ○                                | ○ | ○ | ○ | ○ | ○                                |
| <b>4. How comfortable did you feel overall?</b>                           |   |   |   |   |                                  |   |   |   |   |                                  |
| Not at all<br>comfortable<br>(0)                                          | 1 | 2 | 3 | 4 | Moderately<br>comfortable<br>(5) | 6 | 7 | 8 | 9 | Extremely<br>comfortable<br>(10) |
| ○                                                                         | ○ | ○ | ○ | ○ | ○                                | ○ | ○ | ○ | ○ | ○                                |

**Table S3: Security Questionnaire**

Please rank the following questions on a scale of 0-10 (0-Not at all secure, 10-Extremely secure) by filling in the circle that is most representative of your experience.

|                                                                               |   |   |   |   |                          |   |   |   |   |                             |
|-------------------------------------------------------------------------------|---|---|---|---|--------------------------|---|---|---|---|-----------------------------|
| <b>1. How secure did you feel when the vehicle was accelerating/starting?</b> |   |   |   |   |                          |   |   |   |   |                             |
| Not at all<br>secure (0)                                                      | 1 | 2 | 3 | 4 | Moderately<br>secure (5) | 6 | 7 | 8 | 9 | Extremely<br>secure<br>(10) |

|                                                                               |   |   |   |   |                          |   |   |   |   |                             |
|-------------------------------------------------------------------------------|---|---|---|---|--------------------------|---|---|---|---|-----------------------------|
| ○                                                                             | ○ | ○ | ○ | ○ | ○                        | ○ | ○ | ○ | ○ | ○                           |
| <b>2. How secure did you feel when the vehicle was decelerating/stopping?</b> |   |   |   |   |                          |   |   |   |   |                             |
| Not at all<br>secure (0)                                                      | 1 | 2 | 3 | 4 | Moderately<br>secure (5) | 6 | 7 | 8 | 9 | Extremely<br>secure<br>(10) |
| ○                                                                             | ○ | ○ | ○ | ○ | ○                        | ○ | ○ | ○ | ○ | ○                           |
| <b>3. How secure did you feel when the vehicle was turning?</b>               |   |   |   |   |                          |   |   |   |   |                             |
| Not at all<br>secure (0)                                                      | 1 | 2 | 3 | 4 | Moderately<br>secure (5) | 6 | 7 | 8 | 9 | Extremely<br>secure<br>(10) |
| ○                                                                             | ○ | ○ | ○ | ○ | ○                        | ○ | ○ | ○ | ○ | ○                           |
| <b>4. How secure did you feel when riding in the vehicle?</b>                 |   |   |   |   |                          |   |   |   |   |                             |
| Not at all<br>secure (0)                                                      | 1 | 2 | 3 | 4 | Moderately<br>secure (5) | 6 | 7 | 8 | 9 | Extremely<br>secure<br>(10) |
| ○                                                                             | ○ | ○ | ○ | ○ | ○                        | ○ | ○ | ○ | ○ | ○                           |
| <b>5. How secure did you feel overall?</b>                                    |   |   |   |   |                          |   |   |   |   |                             |
| Not at all<br>secure (0)                                                      | 1 | 2 | 3 | 4 | Moderately<br>secure (5) | 6 | 7 | 8 | 9 | Extremely<br>secure<br>(10) |
| ○                                                                             | ○ | ○ | ○ | ○ | ○                        | ○ | ○ | ○ | ○ | ○                           |

**Table S3: Vehicle riding test results, excluding responses of participants who did not use 4-point tiedown. (n=12)**

|                       | Wheelchair with QLX |                  | Participants' personal WDS |                 | <i>p</i> |
|-----------------------|---------------------|------------------|----------------------------|-----------------|----------|
|                       | M (SD)              | Median (IQR1-3)  | M (SD)                     | Median (IQR1-3) |          |
| SUS                   | 78.1 (12.2)         | 77.5 (68.8-87.5) | 68.1 (25.7)                | 70 (47.5-93.75) | 0.24     |
| NASA TLX              |                     |                  |                            |                 |          |
| Mental demand         | 15.0 (18.1)         | 7.5 (5-12.5)     | 20.0 (22.4)                | 7.5 (5-32.5)    | 0.63     |
| Physical demand       | 13.8 (11.3)         | 7.5 (5-27.5)     | 22.1 (20.4)                | 15 (5-32.5)     | 0.06     |
| Temporal demand       | 12.1 (11.4)         | 7.5 (5-12.5)     | 25.4 (27.3)                | 12.5 (5-47.5)   | 0.13     |
| Performance           | 16.7 (20.3)         | 10 (5-15)        | 22.0 (22.1)                | 15 (5-20)       | 0.19     |
| Effort                | 16.7 (13.5)         | 12.5 (5-25)      | 29.2 (27.9)                | 15 (5-57.5)     | 0.05*    |
| Frustration           | 12.9 (8.4)          | 10 (7.5-15)      | 22.1 (26.1)                | 10 (5-30)       | 0.94     |
| Comfort questionnaire |                     |                  |                            |                 |          |
| Riding                | 9.3 (1.0)           | 9.5 (9-10)       | 8.1 (2.3)                  | 9 (6-10)        | 0.06     |

|                                   |           |              |           |              |        |
|-----------------------------------|-----------|--------------|-----------|--------------|--------|
| Docking in the vehicle            | 9.1 (1.0) | 9 (8.5-10)   | 6.7 (3.1) | 7 (5-10)     | 0.03*  |
| Vehicle Ingress/Egress            | 8.9 (1.4) | 8.5 (8-9)    | 8.1 (1.7) | 8.5 (7-9.5)  | 0.10   |
| Overall                           | 9.2 (1.0) | 9.5 (8.5-10) | 8.1 (2.2) | 8.5 (6.5-10) | 0.06   |
| Security questionnaire            |           |              |           |              |        |
| Accelerating/Starting the vehicle | 9.2 (1.0) | 9.5 (8.5-10) | 7.8 (2.7) | 9 (6.5-10)   | 0.06   |
| Decelerating/Stopping the vehicle | 9.3 (1.0) | 9.5 (9-10)   | 7.9 (2.7) | 9 (6.5-10)   | 0.06   |
| Turning                           | 9.3 (1.1) | 10 (8.5-10)  | 7.5 (2.9) | 8.5 (5.5-10) | 0.01** |
| Riding                            | 9.3 (1.0) | 10 (9-10)    | 8.3 (2.3) | 9 (7-10)     | 0.03*  |
| Overall                           | 9.3 (1.2) | 10 (9-10)    | 8.1 (2.5) | 9 (6.5-10)   | 0.03*  |

\* $p < .05$ , \*\* $p < .01$
